# Supplementary material for: Factors Associated with Biosimilar Exclusions and Step Therapy Restrictions Among US Commercial Health Plans
Source: PubMed Central journal article supplement — BioDrugs. 2023 Apr 1;37(4):531–40. doi: 10.1007/s40259-023-00593-7 (PMC10287773; doi:10.1007/s40259-023-00593-7), 2023-04-01
Supplement: 40259_2023_593_MOESM1_ESM.pdf [file 40259_2023_593_MOESM1_ESM.pdf]

## **Factors Associated with Biosimilar Exclusions and Step Therapy Restrictions among U.S. Commercial Health Plans**

**Journal: BioDrugs**

**Authors:**

Tianzhou Yu, MPH; Shihan Jin, MPH; Chang Li, MA; James D. Chambers, PhD, MPharm, MSc; Jakub P. Hlávka, PhD

**Correspondence author:**

Tianzhou Yu, MPH

Department of Pharmaceutical and Health Economics, School of Pharmacy, University of Southern California, Los Angeles, CA, United States

Email: [tyu09191@usc.edu](mailto:tyu09191@usc.edu)

### ESM 1. Treatment duration estimates and WAC price update dates for biosimilar-indication pairs identified in the SPEC Database

| Reference brand name | Biosimilar brand name | Biosimilar generic name | WAC price date in Redbook | Indication                                              | Duration  | Source                              |
|----------------------|-----------------------|-------------------------|---------------------------|---------------------------------------------------------|-----------|-------------------------------------|
| Avastin              | Mvasi                 | bevacizumab-awwb        | 08/18/2021                | Cervical cancer - Persistent/Recurrent/Metastatic       | 6 months  | Assumption                          |
| Avastin              | Mvasi                 | bevacizumab-awwb        | 08/18/2021                | Colorectal cancer - Metastatic                          | 6 months  | Assumption                          |
| Avastin              | Mvasi                 | bevacizumab-awwb        | 08/18/2021                | Glioblastoma                                            | 6 months  | Assumption                          |
| Avastin              | Mvasi                 | bevacizumab-awwb        | 08/18/2021                | Non-small cell lung cancer - Nonsquamous                | 6 months  | Assumption                          |
| Avastin              | Mvasi                 | bevacizumab-awwb        | 08/18/2021                | Renal cell carcinoma - Metastatic                       | 6 months  | Assumption                          |
| Avastin              | Zirabev               | bevacizumab-bvzr        | 12/31/2019                | Cervical cancer - Persistent/Recurrent/Metastatic       | 6 months  | Assumption                          |
| Avastin              | Zirabev               | bevacizumab-bvzr        | 12/31/2019                | Colorectal cancer - Metastatic                          | 6 months  | Assumption                          |
| Avastin              | Zirabev               | bevacizumab-bvzr        | 12/31/2019                | Glioblastoma                                            | 6 months  | Assumption                          |
| Avastin              | Zirabev               | bevacizumab-bvzr        | 12/31/2019                | Non-small cell lung cancer - Nonsquamous                | 6 months  | Assumption                          |
| Avastin              | Zirabev               | bevacizumab-bvzr        | 12/31/2019                | Renal cell carcinoma - Metastatic                       | 6 months  | Assumption                          |
| Herceptin            | Herzuma               | trastuzumab-pkrb        | 03/16/2020                | Breast cancer - Adjuvant treatment                      | 12 months | <a href="#">Earl et al., 2019</a>   |
| Herceptin            | Herzuma               | trastuzumab-pkrb        | 03/16/2020                | Breast cancer - Metastatic                              | 6 months  | Assumption                          |
| Herceptin            | Herzuma               | trastuzumab-pkrb        | 03/16/2020                | Gastric cancer - Metastatic                             | 6 months  | Assumption                          |
| Herceptin            | Kanjinti              | trastuzumab-anns        | 08/18/2021                | Breast cancer - Adjuvant treatment                      | 12 months | <a href="#">Earl et al., 2019</a>   |
| Herceptin            | Kanjinti              | trastuzumab-anns        | 08/18/2021                | Breast cancer - Metastatic                              | 6 months  | Assumption                          |
| Herceptin            | Kanjinti              | trastuzumab-anns        | 08/18/2021                | Gastric cancer - Metastatic                             | 6 months  | Assumption                          |
| Herceptin            | Ogivri                | trastuzumab-dkst        | 11/29/2019                | Breast cancer - Adjuvant treatment                      | 12 months | <a href="#">Earl et al., 2019</a>   |
| Herceptin            | Ogivri                | trastuzumab-dkst        | 11/29/2019                | Breast cancer - Metastatic                              | 6 months  | Assumption                          |
| Herceptin            | Ogivri                | trastuzumab-dkst        | 11/29/2019                | Gastric cancer - Metastatic                             | 6 months  | Assumption                          |
| Herceptin            | Ontruzant             | trastuzumab-dttb        | 04/15/2020                | Breast cancer - Adjuvant treatment                      | 12 months | <a href="#">Earl et al., 2019</a>   |
| Herceptin            | Ontruzant             | trastuzumab-dttb        | 04/15/2020                | Breast cancer - Metastatic                              | 6 months  | Assumption                          |
| Herceptin            | Ontruzant             | trastuzumab-dttb        | 04/15/2020                | Gastric cancer - Metastatic                             | 6 months  | Assumption                          |
| Herceptin            | Trazimera             | trastuzumab-qyyp        | 02/18/2020                | Breast cancer - Adjuvant treatment                      | 12 months | <a href="#">Earl et al., 2019</a>   |
| Herceptin            | Trazimera             | trastuzumab-qyyp        | 02/18/2020                | Breast cancer - Metastatic                              | 6 months  | Assumption                          |
| Herceptin            | Trazimera             | trastuzumab-qyyp        | 02/18/2020                | Gastric cancer - Metastatic                             | 6 months  | Assumption                          |
| Neulasta             | Fulphila              | pegfilgrastim-jmdb      | 07/09/2018                | Neutropenia - Myelosuppressive chemotherapy             | 6 months  | Assumption                          |
| Neulasta             | Udenyca               | pegfilgrastim-cbqv      | 01/03/2019                | Neutropenia - Myelosuppressive chemotherapy             | 6 months  | Assumption                          |
| Neulasta             | Ziextenzo             | pegfilgrastim-bmez      | 11/07/2019                | Neutropenia - Myelosuppressive chemotherapy             | 6 months  | Assumption                          |
| Neupogen             | Nivestym              | filgrastim-aafi         | 09/05/2018                | Neutropenia - Acute myeloid leukemia                    | 28 days   | <a href="#">Heil et al., 1997</a>   |
| Neupogen             | Nivestym              | filgrastim-aafi         | 09/05/2018                | Neutropenia - Bone marrow transplantation               | 30 days   | <a href="#">Othman et al., 2018</a> |
| Neupogen             | Nivestym              | filgrastim-aafi         | 09/05/2018                | Neutropenia - Chronic                                   | 5 months  | <a href="#">Dale et al., 1993</a>   |
| Neupogen             | Nivestym              | filgrastim-aafi         | 09/05/2018                | Neutropenia - Myelosuppressive chemotherapy             | 14 days   | <a href="#">Waller et al., 2010</a> |
| Neupogen             | Nivestym              | filgrastim-aafi         | 09/05/2018                | Peripheral blood progenitor cell collection and therapy | 7 days    | FDA Label                           |
| Neupogen             | Zarxio                | filgrastim-sndz         | 09/03/2015                | Neutropenia - Acute myeloid leukemia                    | 28 days   | <a href="#">Heil et al., 1997</a>   |
| Neupogen             | Zarxio                | filgrastim-sndz         | 09/03/2015                | Neutropenia - Bone marrow transplantation               | 30 days   | <a href="#">Othman et al., 2018</a> |
| Neupogen             | Zarxio                | filgrastim-sndz         | 09/03/2015                | Neutropenia - Chronic                                   | 5 months  | <a href="#">Dale et al., 1993</a>   |

| Reference brand name | Biosimilar brand name | Biosimilar generic name | WAC price date in Redbook | Indication                                              | Duration | Source                                         |
|----------------------|-----------------------|-------------------------|---------------------------|---------------------------------------------------------|----------|------------------------------------------------|
| Neupogen             | Zarxio                | filgrastim-sndz         | 09/03/2015                | Neutropenia - Myelosuppressive chemotherapy             | 14 days  | <a href="#">Waller et al., 2010</a>            |
| Neupogen             | Zarxio                | filgrastim-sndz         | 09/03/2015                | Peripheral blood progenitor cell collection and therapy | 7 days   | FDA Label                                      |
| Procrit/Epogen       | Retacrit              | epoetin alfa-epbx       | 05/22/2018                | Anemia - Chemotherapy                                   | 6 months | Assumption                                     |
| Procrit/Epogen       | Retacrit              | epoetin alfa-epbx       | 05/22/2018                | Anemia - Chronic kidney disease                         | 12 weeks | <a href="#">Provenzano et al., 2004</a>        |
| Procrit/Epogen       | Retacrit              | epoetin alfa-epbx       | 05/22/2018                | Anemia - HIV                                            | 12 weeks | <a href="#">Volberding et al., 2004</a>        |
| Procrit/Epogen       | Retacrit              | epoetin alfa-epbx       | 05/22/2018                | Reduction of blood cell transfusions                    | 15 days  | <a href="#">Migeotte et al., 2021</a>          |
| Remicade             | Avsola                | infliximab-axxq         | 05/26/2020                | Ankylosing spondylitis                                  | 12 weeks | <a href="#">Webers et al., 2020</a>            |
| Remicade             | Avsola                | infliximab-axxq         | 05/26/2020                | Crohn's disease                                         | 12 weeks | <a href="#">Lepp et al., 2020</a>              |
| Remicade             | Avsola                | infliximab-axxq         | 05/26/2020                | Crohn's disease - Pediatric                             | 34 weeks | <a href="#">Xu et al., 2021</a>                |
| Remicade             | Avsola                | infliximab-axxq         | 05/26/2020                | Psoriasis                                               | 46 weeks | <a href="#">Kleyn and Griffiths, 2006</a>      |
| Remicade             | Avsola                | infliximab-axxq         | 05/26/2020                | Psoriatic arthritis                                     | 1 year   | <a href="#">Papoutsaki et al., 2013</a>        |
| Remicade             | Avsola                | infliximab-axxq         | 05/26/2020                | Rheumatoid arthritis                                    | 1 year   | <a href="#">Hanrahan and Lee, 2021</a>         |
| Remicade             | Avsola                | infliximab-axxq         | 05/26/2020                | Ulcerative colitis                                      | 46 weeks | <a href="#">Wilhelm et al., 2008</a>           |
| Remicade             | Avsola                | infliximab-axxq         | 05/26/2020                | Ulcerative colitis - Pediatric                          | 46 weeks | <a href="#">Bradley and Oliva-Hemker, 2012</a> |
| Remicade             | Inflectra             | infliximab-dyyb         | 10/17/2016                | Ankylosing spondylitis                                  | 12 weeks | <a href="#">Webers et al., 2020</a>            |
| Remicade             | Inflectra             | infliximab-dyyb         | 10/17/2016                | Crohn's disease                                         | 12 weeks | <a href="#">Lepp et al., 2020</a>              |
| Remicade             | Inflectra             | infliximab-dyyb         | 10/17/2016                | Crohn's disease - Pediatric                             | 34 weeks | <a href="#">Xu et al., 2021</a>                |
| Remicade             | Inflectra             | infliximab-dyyb         | 10/17/2016                | Psoriasis                                               | 46 weeks | <a href="#">Kleyn and Griffiths, 2006</a>      |
| Remicade             | Inflectra             | infliximab-dyyb         | 10/17/2016                | Psoriatic arthritis                                     | 1 year   | <a href="#">Papoutsaki et al., 2013</a>        |
| Remicade             | Inflectra             | infliximab-dyyb         | 10/17/2016                | Rheumatoid arthritis                                    | 1 year   | <a href="#">Hanrahan and Lee, 2021</a>         |
| Remicade             | Inflectra             | infliximab-dyyb         | 10/17/2016                | Ulcerative colitis                                      | 46 weeks | <a href="#">Wilhelm et al., 2008</a>           |
| Remicade             | Inflectra             | infliximab-dyyb         | 10/17/2016                | Ulcerative colitis - Pediatric                          | 46 weeks | <a href="#">Bradley and Oliva-Hemker, 2012</a> |
| Remicade             | Renflexis             | infliximab-abda         | 07/25/2017                | Ankylosing spondylitis                                  | 12 weeks | <a href="#">Webers et al., 2020</a>            |
| Remicade             | Renflexis             | infliximab-abda         | 07/25/2017                | Crohn's disease                                         | 12 weeks | <a href="#">Lepp et al., 2020</a>              |
| Remicade             | Renflexis             | infliximab-abda         | 07/25/2017                | Crohn's disease - Pediatric                             | 34 weeks | <a href="#">Xu et al., 2021</a>                |
| Remicade             | Renflexis             | infliximab-abda         | 07/25/2017                | Psoriasis                                               | 46 weeks | <a href="#">Kleyn and Griffiths, 2006</a>      |

| Reference brand name | Biosimilar brand name | Biosimilar generic name | WAC price date in Redbook | Indication                                                  | Duration      | Source                                         |
|----------------------|-----------------------|-------------------------|---------------------------|-------------------------------------------------------------|---------------|------------------------------------------------|
| Remicade             | Renflexis             | infliximab-abda         | 07/25/2017                | Psoriatic arthritis                                         | > 1 year      | <a href="#">Papoutsaki et al., 2013</a>        |
| Remicade             | Renflexis             | infliximab-abda         | 07/25/2017                | Rheumatoid arthritis                                        | > 1 year      | <a href="#">Hanrahan and Lee, 2021</a>         |
| Remicade             | Renflexis             | infliximab-abda         | 07/25/2017                | Ulcerative colitis                                          | 46 weeks      | <a href="#">Wilhelm et al., 2008</a>           |
| Remicade             | Renflexis             | infliximab-abda         | 07/25/2017                | Ulcerative colitis - Pediatric                              | 46 weeks      | <a href="#">Bradley and Oliva-Hemker, 2012</a> |
| Rituxan              | Riabni                | rituximab-arrx          | 01/01/2021                | Chronic lymphocytic leukemia                                | By # of doses | Label                                          |
| Rituxan              | Riabni                | rituximab-arrx          | 01/01/2021                | Granulomatosis with Polyangiitis & Microscopic Polyangiitis | By # of doses | Label                                          |
| Rituxan              | Riabni                | rituximab-arrx          | 01/01/2021                | Non-Hodgkin's lymphoma                                      | By # of doses | Label                                          |
| Rituxan              | Ruxience              | rituximab-pvvr          | 01/23/2020                | Chronic lymphocytic leukemia                                | By # of doses | Label                                          |
| Rituxan              | Ruxience              | rituximab-pvvr          | 01/23/2020                | Granulomatosis with Polyangiitis & Microscopic Polyangiitis | By # of doses | Label                                          |
| Rituxan              | Ruxience              | rituximab-pvvr          | 01/23/2020                | Non-Hodgkin's lymphoma                                      | By # of doses | Label                                          |
| Rituxan              | Truxima               | rituximab-abbs          | 11/09/2019                | Chronic lymphocytic leukemia                                | By # of doses | Label                                          |
| Rituxan              | Truxima               | rituximab-abbs          | 11/09/2019                | Granulomatosis with Polyangiitis & Microscopic Polyangiitis | By # of doses | Label                                          |
| Rituxan              | Truxima               | rituximab-abbs          | 11/09/2019                | Non-Hodgkin's lymphoma                                      | By # of doses | Label                                          |
| Rituxan              | Truxima               | rituximab-abbs          | 11/09/2019                | Rheumatoid arthritis                                        | By # of doses | Label                                          |

## ESM 2. Model diagnostics for model specification in the main text

We followed [Chambers et al, 2022](#)<sup>1</sup> to conduct model diagnostics. We assessed the model's goodness-of-fit by plotting the receiver operating characteristics (ROC) curve and calculating the area under the curve (AUC). The model had an AUC of 0.92, suggesting a good level of discrimination. We also assessed the goodness-of-fit using the Hosmer–Lemeshow's test. This test indicated a good fit, given a p value > 0.05. We tested for multicollinearity by evaluating the correlation among estimated coefficients. There was no correlation higher than 0.8 between any pairs of coefficients.

---

<sup>1</sup> Chambers, J.D., Margaretos, N.M., Enright, D.E. et al. Is an Orphan Drug's Cost-Effectiveness Associated with US Health Plan Coverage Restrictiveness?. *PharmacoEconomics* 40, 225–232 (2022). <https://doi.org/10.1007/s40273-021-01096-5>

### ESM 3. Alternative model specifications

|                                                                  | Odds Ratio (95% CI)     |                       |                       |                         |
|------------------------------------------------------------------|-------------------------|-----------------------|-----------------------|-------------------------|
|                                                                  | (1)                     | (2)                   | (3)                   | (4)                     |
| Total, N                                                         | 1,181                   | 1,181                 | 1,181                 | 1,181                   |
| McFadden's Adjusted R <sup>2</sup>                               | 0.400                   | 0.379                 | 0.397                 | 0.398                   |
| Log likelihood                                                   | -320.26                 | -334.93               | -326.14               | -323.59                 |
| <b>Characteristics</b>                                           |                         |                       |                       |                         |
| Cancer treatment                                                 | 0.019** (0.008-0.041)   | 0.056** (0.030-0.102) | 0.027** (0.013-0.054) | 0.020** (0.009-0.043)   |
| Pediatric population                                             | 11.558** (3.906-34.203) | 1.235 (0.676-2.255)   | 4.567** (2.105-9.908) | 10.247** (3.512-29.892) |
| FDA line of therapy                                              |                         |                       |                       |                         |
| 1                                                                | Reference               | Reference             | Reference             | Reference               |
| 2                                                                | 0.521 (0.270-1.007)     | 0.415** (0.218-0.791) | 0.509* (0.266-0.974)  | 0.522 (0.271-1.008)     |
| First biosimilar                                                 | 0.225** (0.118-0.429)   | 0.216** (0.114-0.407) | 0.260** (0.148-0.458) | 0.228** (0.120-0.432)   |
| Years since market launch                                        | 0.823 (0.659-1.028)     | 1.085 (0.902-1.305)   | 1.008 (0.855-1.189)   | 0.826 (0.662-1.030)     |
| No. of competitors                                               |                         |                       |                       |                         |
| 1                                                                | Reference               | Reference             | Reference             | Reference               |
| 2                                                                | 0.060* (0.006-0.586)    | 0.017** (0.002-0.158) | 0.038** (0.004-0.348) | 0.061* (0.007-0.561)    |
| 3+                                                               | 3.194 (0.462-22.082)    | 1.351 (0.203-8.985)   | 1.148 (0.186-7.070)   | 2.937 (0.453-19.027)    |
| Disease prevalence                                               |                         |                       |                       |                         |
| < 200,000                                                        | Reference               | Reference             | Reference             | Reference               |
| 200,000 – 1,000,000                                              | 2.000 (0.854-4.685)     | 2.950* (1.297-6.710)  | 1.674 (0.736-3.808)   | 1.992 (0.853-4.652)     |
| > 1,000,000                                                      | 2.067* (1.060-4.029)    | 3.095** (1.622-5.904) | 1.326 (0.732-2.403)   | 2.044* (1.056-3.958)    |
| Annual savings per patient                                       |                         |                       |                       |                         |
| < \$5,000                                                        | Reference               | Reference             | -                     | Reference               |
| \$5,000 - \$9,999                                                | 0.534 (0.273-1.046)     | 0.416** (0.217-0.797) | -                     | 0.537 (0.275-1.047)     |
| \$10,000 - \$15,000                                              | 0.474 (0.213-1.055)     | 0.627 (0.293-1.344)   | -                     | 0.478 (0.216-1.056)     |
| > \$15,000                                                       | 0.171** (0.057-0.514)   | 0.477 (0.186-1.224)   | -                     | 0.174** (0.059-0.518)   |
| Coverage of reference product relative to FDA label              |                         |                       |                       |                         |
| Not more restrictive                                             | Reference               | Reference             | Reference             | Reference               |
| More restrictive                                                 | 0.065** (0.038-0.109)   | 0.067** (0.040-0.111) | 0.069** (0.042-0.115) | 0.065** (0.038-0.109)   |
| Cost-effectiveness measure availability of the reference product |                         |                       |                       |                         |
| Available                                                        | Reference               | -                     | Reference             | Reference               |
| Not available                                                    | 0.066** (0.023-0.186)   | -                     | 0.122** (0.052-0.286) | 0.074** (0.027-0.207)   |
| Plan size                                                        |                         |                       |                       |                         |
| National                                                         | Reference               | Reference             | Reference             | Reference               |

|                                   | Odds Ratio (95% CI)  |                      |                      |                     |
|-----------------------------------|----------------------|----------------------|----------------------|---------------------|
|                                   | (1)                  | (2)                  | (3)                  | (4)                 |
| Regional Pharmacy benefit manager | 1.511 (0.981-2.329)  | 1.808* (1.185-2.758) | 1.599* (1.044-2.448) | 1.489 (0.969-2.288) |
| Big three <sup>a</sup>            | Reference            | Reference            | Reference            | -                   |
| Other                             | 1.683* (1.129-2.507) | 1.543* (1.185-2.758) | 1.670* (1.125-2.478) | -                   |

\* p < 0.05, \*\* p < 0.01

<sup>a</sup> Big three included CVS Caremark, Express Scripts, and OptumRx.

CI: Confidence Interval

- (1) Model specification presented in the main text
- (2) (1) – Cost-effectiveness measure availability of the reference product
- (3) (1) – Annual savings per patient
- (4) (1) – Pharmacy benefit manager type
